# Supplementary material
Source: Springer Nature journal article supplement (https://www.springermedizin.de/resource/supplementary/12891_2014_2374_MOESM2_ESM.pdf/9509860)
Supplement: MOESM2 [file 9509860]

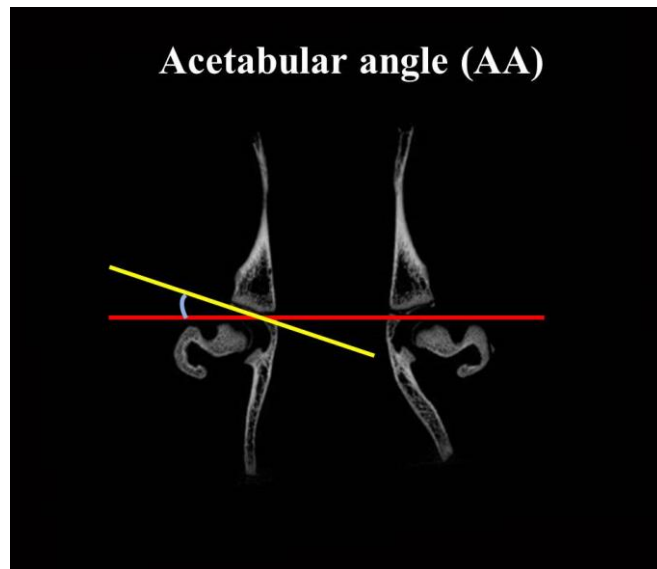

**Supplementary Figure 2** The  $\mu$ CT slice on the XY plane showing the widest inferior margin of ilium was selected. Line A (red) was drawn between the intersection point of the ilium and ischium at each side and line B (yellow) was drawn across the outer edge of the inferior margin of ilium and the above-mentioned intersection point. Acetabular angle (AA) was defined as the angle formed by the two lines (blue).
